# Supplementary material
Source: publisher figshare collection journal article supplement (https://acs.figshare.com/ndownloader/files/4585624)
Supplement: Supplementary file 1 [file 4585624]

**Supporting Information**

July 3, 2008

**Stability and Electrostatic Assembly of Au Nanorods for use in Biological Assays**

Manish Sethi, GaEun Joung, and Marc R. Knecht\*

(3 pages)

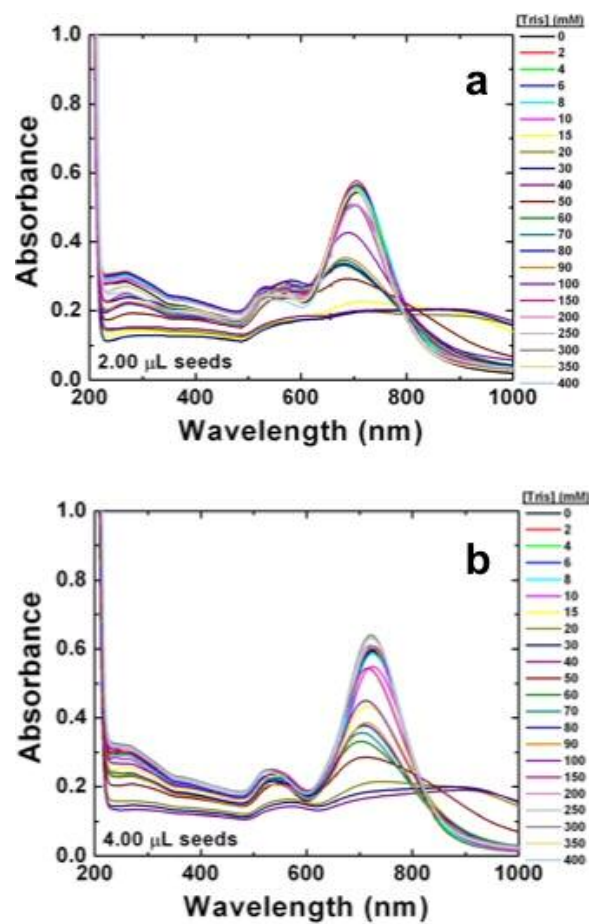

**Figure S1.** UV-vis spectra of Au nanorods dissolved in various concentrations of Tris buffer at pH 7.42. Part (a) corresponds to the materials prepared using 2.00  $\mu\text{L}$  of Au seeds, while part (b) is for the materials produced using 4.00  $\mu\text{L}$  of Au seeds.

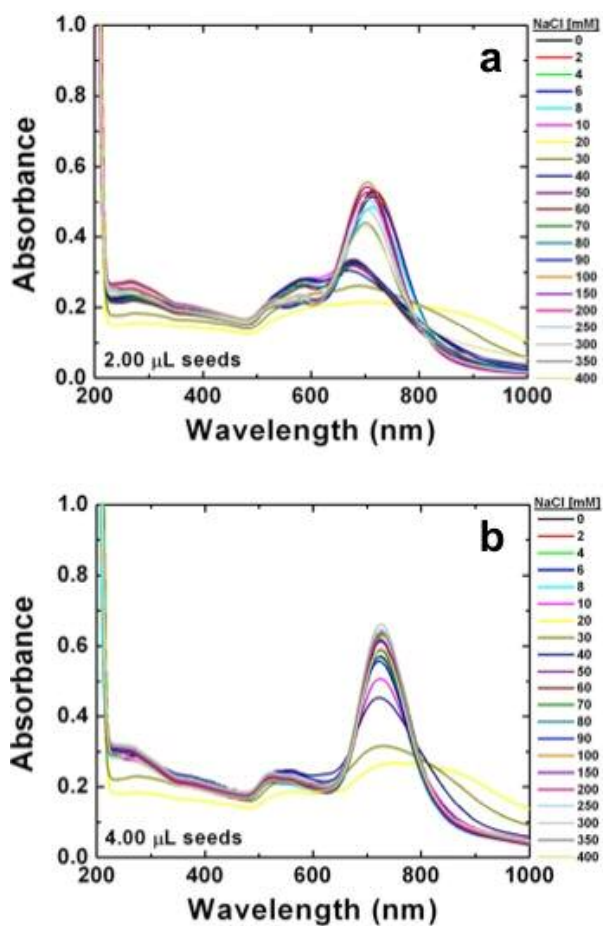

**Figure S2.** UV-vis spectra of Au nanorods dissolved in various concentrations of an aqueous NaCl solution titrated to pH 7.42. Part (a) corresponds to the materials prepared using 2.00  $\mu\text{L}$  of Au seeds, while part (b) is for the materials produced using 4.00  $\mu\text{L}$  of Au seeds.
